# Supplementary material for: One-Health KAP Measures and Their Influence on Health Outcomes in Suburban Population: A Study of Karu, Nasarawa State in Nigeria
Source: Research Square preprint supplement (doi:10.21203/rs.3.rs-6600624/v1), 2025-07-14
Supplement: Supplementary file 1 [file d047a365ab46b09f9f8550d4.xlsx]

## Sheet: Sheet1
Age range	Gender	Marital Status	Education level	Occupation	Do you work with any of these health sectors?	Please what is your household size? (Number of people living in your house)	Have you heard of the One-Health concept before this survey?	If yes, where did you first hear about One Health? (Select all that apply)	How would you rate your understanding of the One-Health concept?	Which of the following are components of One Health? Select all that apply	Have you heard of Zoonotic Diseases before?	Why is the One Health approach important? (Select all that apply).	Which of the following best describes the One-Health concept?	Which of the following diseases are commonly associated with the One-Health approach? (Select all that apply).	Do you know that human health can be affected by the health of animals and the environment?	Which of the following practices are important for promoting One-Health principles? (Select all that apply)?	How important do you think it is to integrate human, animal, and environmental health?	Do you believe that animal health has an impact on human health?	Do you agree that environmental conservation is essential for maintaining public health?	How supportive are you of initiatives that promote One Health principles in your community?	Do you think there is a need for more education on One Health in your community?	To what extent do you feel that your personal actions can positively impact One-Health outcomes?	How often do you keep or interact with animals (pets, livestock, etc.)?	If you keep livestock animal like chicken or goat, what actions do you mostly take when they get sick?	If you keep pets like cats or dogs, what actions do you take when they get sick?	How often do you seek veterinary care for your animals?	Do you eat the meat of any of these animals (Select all that apply)?	Has any member of your household or neighbour fallen ill to any of these illnesses in the last 2 years? (Select all that apply)	Do you ensure proper disposal of animal waste in your household or community?	Do you take preventive measures to protect yourself and your family from diseases that affect both human and animals (e.g., vaccination of pets, proper food handling)?	Are you involved in any environmental conservation activities (e.g., tree planting, waste management)?	What practices do you follow to ensure environmental hygiene in your home and surroundings? (Check all that apply).	What barriers do you face in implementing One Health practices? (Select all that apply).	Column1
25-34	Male	Single	Completed Postgraduate Education	Civil servant	Human Health	5-6	No	I have not heard	Hearing for the 1st time	Human health, Economic health, Environmental health, Social health, Animal health	Yes	I don't know	The integration of human, animal, and environmental health	Cholera, Lassa Fever	Possibly, but not sure how	Maintaining personal hygiene	Important	Agree	Agree	Supportive	Agree	A little	Daily	Take to veterinarian	Take to veterinarian	Sometimes	Cow, Chicken, Pig, Rat, Dog, Any Bush Meat eg bird, monkey, etc		Often	Sometimes	Yes	Regular garbage disposal, Proper sanitation facilities, Safe water practices, Pest control measures	Lack of knowledge, Lack of resources	Not Approved
35-44	Male	Married	Completed Postgraduate Education	Cooperate private sector	Human Health	3-4	No	I have notnhear it before	Hearing for the 1st time	Human health	No	I don't know	The integration of human, animal, and environmental health	Rabies	Yes	Maintaining personal hygiene	Important	Agree	Agree	Not supportive	Agree	A lot	Rarely	Treat at home until livestock recovers or dies	Treat at home until pet recovers or dies	Never	Cow, Chicken, Ram, Dog		Often	Sometimes	No	Proper sanitation facilities	Lack of knowledge	Not Approved
25-34	Female	Single	Completed Postgraduate Education	Student	Human Health	7-9	Yes	Media (TV, radio, newspapers)	Good	Human health, Economic health, Environmental health, Social health, Animal health	Yes	It helps prevent zoonotic diseases, It promotes environmental sustainability, It improves overall public health, It is cost-effective	The integration of human, animal, and environmental health	Malaria, Ebola, Rabies, Cholera, Lassa Fever	Yes	Vaccinating animals, Proper waste disposal, Maintaining personal hygiene	Important	Agree	Agree	Willing to support	Agree	A lot	Daily	Treat at home until livestock recovers or dies	Take to veterinarian	Sometimes	Cow, Chicken		Always	Always	Yes	Regular garbage disposal, Proper sanitation facilities, Safe water practices, Pest control measures	Lack of resources	Not Approved
25-34	Male	Single	Completed Tertiary Education	Business man/woman	None	5-6	No	Internet	Hearing for the 1st time	Human health	No	I don't know	A focus on human health	Malaria, Ebola, Rabies, Cholera, Lassa Fever	Yes	Vaccinating animals, Proper waste disposal, Maintaining personal hygiene	Not sure	Don't know	Agree	Willing to support	Agree	A little	Rarely	Slaughter for meal if illness persist	Take to veterinarian	Sometimes	Cow, Chicken, Ram, Pig, Dog	Cholera	Always	Always	No	Regular garbage disposal, Proper sanitation facilities, Safe water practices	Lack of knowledge, Financial constraints, Lack of resources	Not Approved
18-24	Female	Single	Completed Tertiary Education	Unemployed	None	7-9	Maybe	Educational institution	Hearing for the 1st time	Human health	Yes	It helps prevent zoonotic diseases, It improves overall public health	The integration of human, animal, and environmental health	Ebola, Rabies, Cholera, Lassa Fever	Possibly, but not sure how	Vaccinating animals, Proper waste disposal, Maintaining personal hygiene	Important	Agree	Agree	Willing to support	Agree	A little	Daily	Treat at home until livestock recovers or dies	Take to veterinarian	Always	Cow, Chicken, Ram		Always	Always	No	Regular garbage disposal, Proper sanitation facilities, Safe water practices	Lack of knowledge	Not Approved
18-24	Female	Single	Completed Tertiary Education	Student	None	5-6	No	Internet	Hearing for the 1st time	Human health, Environmental health, Animal health	Yes	It helps prevent zoonotic diseases	The integration of human, animal, and environmental health	Lassa Fever	Yes	Vaccinating animals	Important	Agree	Agree	Don’t know how to support	Agree	A lot	Daily	Treat at home until livestock recovers or dies	Take to veterinarian	Sometimes	Cow, Chicken, Pig		Often	Always	Maybe	Regular garbage disposal, Safe water practices	Lack of knowledge, Financial constraints	Not Approved
35-44	Female	Single	Completed Postgraduate Education	Business man/woman	None	1-2	Yes	Friend	Good	Human health, Environmental health, Animal health	No	It improves overall public health	The integration of human, animal, and environmental health	Malaria, Cholera, Lassa Fever	Yes	Vaccinating animals, Proper waste disposal, Maintaining personal hygiene	Important	Agree	Agree	Supportive	Agree	A lot	Daily	Take to veterinarian	Take to veterinarian	Sometimes	Cow, Chicken, Ram		Always	Sometimes	Yes	Regular garbage disposal, Proper sanitation facilities, Safe water practices, Pest control measures	Lack of knowledge, Financial constraints, Lack of resources, Cultural beliefs	Not Approved
25-34	Female	Single	Completed Postgraduate Education	Unemployed	None	5-6	Yes	Educational institution	Good	Human health, Environmental health, Animal health	Yes	It improves overall public health	The integration of human, animal, and environmental health	Ebola	Yes	Vaccinating animals, Maintaining personal hygiene	Important	Agree	Agree	Supportive	Agree	A lot	Rarely	Treat at home until livestock recovers or dies	Treat at home until pet recovers or dies	Sometimes	Cow, Chicken		Sometimes	Always	No	Regular garbage disposal, Safe water practices	Lack of knowledge	Not Approved
25-34	Male	Married	Completed Postgraduate Education	Cooperate private sector	None	3-4	Yes	Community meeting	Good	Human health, Environmental health	No	It promotes environmental sustainability	A focus on environmental health	Cholera	Yes	Maintaining personal hygiene	Important	Agree	Agree	Supportive	Agree	A lot	Rarely	Take to veterinarian	Take to veterinarian	Always	Cow, Chicken, Ram	Cholera	Always	Always	Yes	Regular garbage disposal, Proper sanitation facilities, Safe water practices, Pest control measures	Cultural beliefs	Not Approved
18-24	Male	Single	Completed Secondary Education	Student	None	7-9	Yes	Yusuf mshiel	Good	Human health	No	It promotes environmental sustainability	A focus on environmental health	Malaria	Yes	Proper waste disposal	Important	Agree	Agree	Supportive	Agree	A lot	Weekly	Treat at home until livestock recovers or dies	Take to veterinarian	Sometimes	Chicken	Tuberculosis (TB)	Always	Sometimes	Yes	Proper sanitation facilities	Lack of resources	Not Approved
18-24	Male	Single	Completed Postgraduate Education	Unemployed	Human Health	5-6	Yes	Educational institution	Good	Human health, Environmental health, Animal health	Yes	It helps prevent zoonotic diseases, It promotes environmental sustainability, It improves overall public health	The integration of human, animal, and environmental health	Malaria, Ebola, Rabies, Cholera, Lassa Fever	Yes	Vaccinating animals, Proper waste disposal, Maintaining personal hygiene	Important	Agree	Agree	Supportive	Agree	A lot	Monthly	Take to veterinarian	Take to veterinarian	Sometimes	Cow, Chicken, Ram, Pig, Dog, Any Bush Meat eg bird, monkey, etc		Sometimes	Always	Maybe	Regular garbage disposal, Proper sanitation facilities, Safe water practices, Pest control measures	Lack of knowledge, Financial constraints, Lack of resources, Cultural beliefs,	Not Approved
25-34	Female	Married	Completed Tertiary Education	Civil servant	None	7-9	No	Never heard	Hearing for the 1st time	Human health, Environmental health, Social health	No	I don't know	The integration of human, animal, and environmental health	Cholera	Yes	Vaccinating animals, Proper waste disposal, Maintaining personal hygiene	Important	Agree	Agree	Supportive	Agree	A lot	Rarely	Take to veterinarian	Take to veterinarian	Always	Cow, Chicken, Ram, Pig		Always	Always	Yes	Regular garbage disposal, Proper sanitation facilities, Safe water practices, Pest control measures	Lack of knowledge	Not Approved
25-34	Male	Single	Completed Postgraduate Education	Cooperate private sector	Human Health	1-2	Yes	Healthcare provider	Fair	Human health, Environmental health, Social health	Maybe	It helps prevent zoonotic diseases, It promotes environmental sustainability, It improves overall public health, It is cost-effective	The integration of human, animal, and environmental health	Malaria, Ebola, Rabies, Cholera, Lassa Fever	Yes	Vaccinating animals, Proper waste disposal, Maintaining personal hygiene	Important	Agree	Agree	Supportive	Agree	A lot	Monthly	Take to veterinarian	Take to veterinarian	Sometimes	Cow, Chicken, Ram	Cholera, Tuberculosis (TB)	Sometimes	Sometimes	Yes	Regular garbage disposal, Proper sanitation facilities, Safe water practices	Financial constraints, Cultural beliefs	Not Approved
18-24	Female	Single	Completed Tertiary Education	Student	None	3-4	No	Friend	Hearing for the 1st time	Human health, Economic health, Environmental health, Social health	Yes	It helps prevent zoonotic diseases	The integration of human, animal, and environmental health	Malaria, Cholera	Yes	Maintaining personal hygiene	Not sure	Agree	Agree	Supportive	Agree	A little	Rarely	Slaughter for meal if illness persist	Take to veterinarian	Sometimes	Cow, Chicken, Ram		Often	Always	No	Regular garbage disposal, Proper sanitation facilities, Safe water practices, Pest control measures	Lack of knowledge, Lack of resources	Not Approved
18-24	Male	Single	Completed Tertiary Education	Student	None	5-6	Yes	Healthcare provider	Good	Human health, Environmental health, Animal health	Yes	It helps prevent zoonotic diseases, It promotes environmental sustainability, It improves overall public health, It is cost-effective	The integration of human, animal, and environmental health	Ebola, Rabies, Lassa Fever	Yes	Vaccinating animals, Proper waste disposal, Maintaining personal hygiene	Important	Agree	Agree	Supportive	Agree	A lot	Daily	Take to veterinarian	Take to veterinarian	Always	Cow, Chicken, Ram, Pig		Often	Always	Yes	Regular garbage disposal, Proper sanitation facilities, Safe water practices, Pest control measures	Financial constraints	Not Approved
18-24	Female	Single	Completed Secondary Education	Student	None	5-6	No	Internet	Hearing for the 1st time	Human health	Maybe	It helps prevent zoonotic diseases, I don't know	A focus on human health	Cholera	Yes	Vaccinating animals	Important	Agree	Agree	Don’t know how to support	Agree	A little	Rarely	Slaughter for meal if illness persist	Sale/Dash to dog/cat eaters	Sometimes	Cow, Chicken, Ram		Always	Sometimes	No	Regular garbage disposal	Lack of resources	Not Approved
25-34	Female	Single	Completed Postgraduate Education	Cooperate private sector	Human Health	1-2	Yes	Educational institution	Good	Human health, Environmental health, Animal health	Yes	It helps prevent zoonotic diseases, It promotes environmental sustainability, It improves overall public health, It is cost-effective	The integration of human, animal, and environmental health	Malaria, Ebola, Rabies, Cholera, Lassa Fever	Yes	Vaccinating animals, Proper waste disposal, Maintaining personal hygiene	Important	Agree	Agree	Willing to support	Agree	A lot	Rarely	Take to veterinarian	Take to veterinarian	Sometimes	Cow, Chicken, Ram, Rat, Dog, Any Bush Meat eg bird, monkey, etc	Tuberculosis (TB)	Always	Always	Yes	Regular garbage disposal, Safe water practices, Pest control measures	Lack of resources	Not Approved
35-44	Male	Married	Completed Tertiary Education	Civil servant	None	1-2	No	From this survey	Hearing for the 1st time	Human health, Environmental health, Animal health	Yes	It improves overall public health	The integration of human, animal, and environmental health	Malaria, Ebola, Cholera	Yes	Vaccinating animals, Proper waste disposal, Maintaining personal hygiene	Important	Agree	Neutral	Don’t know how to support	Agree	A little	Daily	Treat at home until livestock recovers or dies	Sale/Dash to dog/cat eaters	Not applicable (I do not have animals)	Cow, Chicken, Ram, Pig, Dog		Rarely	Sometimes	No	Regular garbage disposal	Lack of knowledge, Financial constraints	Not Approved
35-44	Male	Married	Completed Postgraduate Education	Civil servant	Human Health	7-9	Yes	Educational institution	Good	Human health, Environmental health, Animal health	Yes	It helps prevent zoonotic diseases, It promotes environmental sustainability, It improves overall public health, It is cost-effective	The integration of human, animal, and environmental health	Ebola, Rabies, Lassa Fever	Yes	Vaccinating animals, Proper waste disposal, Maintaining personal hygiene	Important	Agree	Agree	Supportive	Agree	A lot	Weekly	Treat at home until livestock recovers or dies	Treat at home until pet recovers or dies	Sometimes	Cow, Chicken, Ram, Pig	Tuberculosis (TB)	Often	Always	Yes	Regular garbage disposal, Proper sanitation facilities, Safe water practices, Pest control measures	Lack of knowledge, Financial constraints, Lack of resources, Cultural beliefs	Not Approved
35-44	Male	Married	Completed Tertiary Education	Civil servant	Animal Health	5-6	Yes	Educational institution	Fair	Animal health	Yes	It helps prevent zoonotic diseases, It promotes environmental sustainability, It improves overall public health	The integration of human, animal, and environmental health	Ebola, Rabies, Lassa Fever	Yes	Vaccinating animals, Proper waste disposal, Maintaining personal hygiene	Important	Agree	Agree	Supportive	Agree	A lot	Daily	Take to veterinarian	Take to veterinarian	Always	Cow, Chicken, Ram	Cholera	Often	Always	No	Regular garbage disposal, Proper sanitation facilities, Safe water practices, Pest control measures	Lack of knowledge, Financial constraints, Lack of resources, Cultural beliefs, Lack of willingness from government and also some human doctors	Not Approved
25-34	Female	Single	Completed Secondary Education	Unemployed	None	5-6	No	None	Hearing for the 1st time	Human health	No	I don't know	A focus on human health	Malaria	Possibly, but not sure how	Proper waste disposal, Maintaining personal hygiene	Important	Agree	Agree	Willing to support	Agree	A lot	Weekly	Treat at home until livestock recovers or dies	Slaughter for meal if illness persist	Rarely	Cow, Chicken, Ram, Pig		Often	Always	Yes	Regular garbage disposal, Safe water practices, Pest control measures	Lack of knowledge, Financial constraints, Lack of resources, Cultural beliefs	Not Approved
35-44	Female	Married	Completed Postgraduate Education	Civil servant	Human Health	3-4	Yes	Internet	Fair	Human health	Yes	It improves overall public health	The integration of human, animal, and environmental health	Lassa Fever	Yes	Maintaining personal hygiene	Important	Agree	Agree	Supportive	Agree	A lot	Rarely	Take to veterinarian	Take to veterinarian	Not applicable (I do not have animals)	Cow, Chicken, Ram	None	Always	Always	Yes	Regular garbage disposal	None	Not Approved
55-64	Female	Married	Completed Tertiary Education	Business man/woman	Animal Health	5-6	Maybe		Fair	Animal health	Yes	It helps prevent zoonotic diseases	The integration of human, animal, and environmental health	Rabies	Yes	Maintaining personal hygiene	Not sure	Agree	Agree	Willing to support	Neutral	A little	Weekly	Slaughter for meal if illness persist	Slaughter for meal if illness persist	Not applicable (I do not have animals)	Chicken	None	Sometimes	Always	No	Regular garbage disposal, Pest control measures	Financial constraints	Not Approved
45-54	Male	Divorced	Completed Tertiary Education	Civil servant	Animal Health	3-4	Yes	Internet	Fair	Human health, Environmental health, Animal health	Yes	It helps prevent zoonotic diseases, It promotes environmental sustainability, It improves overall public health, It is cost-effective	The integration of human, animal, and environmental health	Ebola, Rabies, Lassa Fever	Yes	Vaccinating animals, Proper waste disposal, Maintaining personal hygiene	Not sure	Possibly but not sure how	Agree	Supportive	Agree	A lot	Weekly	Take to veterinarian	Treat at home until pet recovers or dies	Not applicable (I do not have animals)	Cow, Chicken, Ram, Pig, Rat, Dog	None	Always	Always	No	Regular garbage disposal, Proper sanitation of facilities, Safe water practices, Pest control measures	Lack of knowledge, Financial constraints, Lack of resources, Cultural beliefs	Not Approved
45-54	Male	Married	Completed Secondary Education	Civil servant	Animal Health	10+	Yes	Media (TV, radio, newspapers)	Good	Human health, Economic health, Environmental health, Social health, Animal health	Yes	It helps prevent zoonotic diseases, It promotes environmental sustainability, It improves overall public health	The integration of human, animal, and environmental health	Malaria, Ebola, Rabies, Cholera, Lassa Fever	Yes	Vaccinating animals, Proper waste disposal, Maintaining personal hygiene	Important	Agree	Agree	Don’t know how to support	Agree	A lot	Weekly	Slaughter for meal if illness persist	Treat at home until pet recovers or dies	Always	Cow, Chicken, Ram	None	Rarely	Always	Yes	Regular garbage disposal, Proper sanitation of facilities, Safe water practices, Pest control measures, Proper public enlightenment	Lack of knowledge, Cultural beliefs	Not Approved
35-44	Female	Single	Completed Postgraduate Education	Cooperate private sector	Animal Health	5-6	Yes	Community meeting	Good	Human health, Economic health, Social health	Yes	It helps prevent zoonotic diseases, It promotes environmental sustainability, It improves overall public health, It is cost-effective	The integration of human, animal, and environmental health	Malaria, Ebola, Rabies, Cholera	Yes	Vaccinating animals, Proper waste disposal, Maintaining personal hygiene	Important	Possibly but not sure how	Agree	Don’t know how to support	Agree	A lot	Daily	Take to veterinarian	Take to veterinarian	Rarely	Cow, Chicken, Ram, Pig		Often	Always	No	Regular garbage disposal, Proper sanitation of facilities, Safe water practices, Pest control measures, Proper drainage systems	Lack of knowledge, Financial constraints	Not Approved
35-44	Female	Married	Completed Postgraduate Education	Cooperate private sector	Animal Health	5-6	Yes	Internet	Good	Human health, Social health, Animal health	Yes	It helps prevent zoonotic diseases, It promotes environmental sustainability, It improves overall public health, It is cost-effective	The integration of human, animal, and environmental health	Malaria, Ebola, Rabies, Cholera, Lassa Fever	Yes	Vaccinating animals, Proper waste disposal, Maintaining personal hygiene	Important	Agree	Agree	Supportive	Agree	A lot	Daily	Take to veterinarian	Take to veterinarian	Always	Cow, Chicken, Ram, Pig		Always	Always	Yes	Regular garbage disposal, Proper sanitation of facilities, Safe water practices, Pest control measures	Lack of resources, Cultural beliefs	Not Approved
25-34	Male	Single	Completed Postgraduate Education	Civil servant	Animal Health	7-9	Yes	Community meeting	Fair	Human health, Environmental health, Animal health	Yes	It helps prevent zoonotic diseases, It promotes environmental sustainability, It improves overall public health, It is cost-effective	The integration of human, animal, and environmental health	Ebola, Rabies, Cholera, Lassa Fever	Yes	Vaccinating animals, Proper waste disposal, Maintaining personal hygiene, None of the above	Important	Agree	Agree	Supportive	Agree	A lot	Daily	Slaughter for meal if illness persist	Slaughter for meal if illness persist	Always	Cow, Chicken, Ram, Pig, Rat, Dog, Any Bush Meat eg bird, monkey, etc		Often	Always	Maybe	Regular garbage disposal, Proper sanitation of facilities, Safe water practices, Pest control measures	Financial constraints, Lack of resources	Not Approved
25-34	Male	Married	No formal education	Farmer	None	5-6	No	Community meeting	Poor	Human health, Animal health	No	I don't know	The integration of human, animal, and environmental health	Malaria, Ebola, Rabies, Lassa Fever	No	None of the above	Not sure	Neutral	Neutral	Willing to support	Neutral	A little	Daily	Slaughter for meal if illness persist	Sale/Dash to dog/cat eaters	Never	Cow, Chicken, Ram, Pig, Dog, Any Bush Meat eg bird, monkey, etc	Cholera	Always	Always	Maybe	Regular garbage disposal, Proper sanitation of facilities, Pest control measures	Lack of knowledge, Financial constraints, Lack of resources	Not Approved
18-24	Male	Single	Completed Secondary Education	Student	None	3-4	No	None	Poor	Human health	No	I don't know	A focus on human health	Malaria	Yes	Vaccinating animals	Not sure	Neutral	Neutral	Willing to support	Neutral	A little	Daily	Slaughter for meal if illness persist	Sale/Dash to dog/cat eaters	Never	Cow, Chicken, Ram, Pig, Rat, Dog, Any Bush Meat eg bird, monkey, etc	Cholera, Tuberculosis (TB), Sleeping Sickness (Trypanosomiasis)	Always	Always	No	Regular garbage disposal, Proper sanitation of facilities, Pest control measures	Lack of knowledge, Financial constraints, Lack of resources	Not Approved
18-24	Female	Single	Completed Tertiary Education	Cooperate private sector	Animal Health	3-4	Yes	Educational institution	Good	Human health, Environmental health, Animal health	Yes	It helps prevent zoonotic diseases, It promotes environmental sustainability, It improves overall public health	The integration of human, animal, and environmental health	Malaria, Ebola, Rabies, Cholera, Lassa Fever	Yes	Vaccinating animals, Proper waste disposal, Maintaining personal hygiene	Important	Agree	Agree	Supportive	Agree	A lot	Daily	Take to veterinarian	Take to veterinarian	Always	Pig	COVID19	Always	Always	Yes	Regular garbage disposal, Proper sanitation of facilities, Safe water practices, Pest control measures	Lack of resources	Not Approved
35-44	Male	Single	Completed Postgraduate Education	Business man/woman	None	3-4	Yes	Internet	Good	Human health, Animal health	Yes	I don't know	The integration of human, animal, and environmental health	Lassa Fever	Yes	Proper waste disposal	Important	Agree	Disagree	Supportive	Agree	A lot	Rarely	Treat at home until livestock recovers or dies	Take to veterinarian	Never	Cow, Chicken, Ram	None	Sometimes	Sometimes	Yes	Regular garbage disposal, Proper sanitation of facilities	Lack of knowledge, Financial constraints, Cultural beliefs	Not Approved
45-54	Male	Married	Completed Tertiary Education	Cooperate private sector	None	1-2	Yes	Internet	Good	Human health, Animal health	Yes	It improves overall public health	The integration of human, animal, and environmental health	Cholera, Lassa Fever	Yes	Proper waste disposal	Important	Agree	Agree	Supportive	Agree	A lot	Weekly	Take to veterinarian	Take to veterinarian	Never	Cow, Chicken	None	Sometimes	Sometimes	Yes	Regular garbage disposal, Proper sanitation of facilities	Cultural beliefs	Not Approved
18-24	Female	Single	Completed Tertiary Education	Unemployed	Human Health	7-9	Yes	Educational institution	Fair	Human health, Environmental health, Animal health	Yes	It helps prevent zoonotic diseases, It promotes environmental sustainability, It improves overall public health	The integration of human, animal, and environmental health	Malaria, Ebola, Rabies, Lassa Fever	Yes	Vaccinating animals, Proper waste disposal, Maintaining personal hygiene	Important	Agree	Agree	Willing to support	Agree	A little	Rarely	Wait to recover with no action	Sale/Dash to dog/cat eaters	Never	Cow, Chicken, Ram, Pig	None	Always	Always	No	Regular garbage disposal, Proper sanitation of facilities, Safe water practices, Pest control measures	Lack of resources	Not Approved
18-24	Female	Single	Completed Postgraduate Education	Cooperate private sector	None	7-9	Maybe	Educational institution	Fair	Human health	No	It promotes environmental sustainability	The integration of human, animal, and environmental health	Lassa Fever	Don't know	None of the above	Important	Don't know	Neutral	Don’t know how to support	Agree	Not at all	Never	Treat at home until livestock recovers or dies	Slaughter for meal if illness persist	Never	Cow, Any Bush Meat eg bird, monkey, etc	Lassa Fever	Never	Sometimes	Maybe	Proper sanitation of facilities	Cultural beliefs	Not Approved
45-54	Male	Married	Completed Tertiary Education	Cooperate private sector	None	3-4	Yes	Media (TV, radio, newspapers)	Good	Human health, Animal health	No	It is cost-effective	A focus on environmental health	Lassa Fever	Yes	Proper waste disposal	Important	Agree	Possibly but not sure how	Supportive	Agree	A lot	Rarely	Take to veterinarian	Treat at home until pet recovers or dies	Rarely	Cow, Chicken	None	Rarely	Sometimes	Yes	Proper sanitation of facilities	Lack of resources	Not Approved
25-34	Female	Married	Completed Secondary Education	Business man/woman	Environmental health	7-9	No	None	Hearing for the 1st time	Environmental health	No	It promotes environmental sustainability	A focus on animal health	Ebola	No	Vaccinating animals	Important	Possibly but not sure how	Agree	Supportive	Agree	Not at all	Monthly	Take to veterinarian	Take to veterinarian	Never	Cow, Chicken, Dog	Cholera, Tuberculosis (TB)	Rarely	Sometimes	No	Regular garbage disposal	Financial constraints	Not Approved
18-24	Male	Single	No formal education	Unemployed	None	10+	No		Poor	Economic health	Maybe	It improves overall public health	A focus on animal health	Malaria	No	Proper waste disposal	Important	Possibly but not sure how	Agree	Supportive	Agree	A little	Daily	Treat at home until livestock recovers or dies	Treat at home until pet recovers or dies	Never	Cow, Any Bush Meat eg bird, monkey, etc	Lassa Fever	Rarely	Sometimes	Maybe	Safe water practices	Lack of knowledge	Not Approved
45-54	Female	Single	Completed Secondary Education	Farmer	None	3-4	No	Healthcare provider	Poor	Human health	Yes	I don't know	A focus on environmental health	Lassa Fever	Possibly, but not sure how	Proper waste disposal	Don't know	Possibly but not sure how	Don't know	Don’t know how to support	Agree	Not at all	Rarely	Slaughter for meal if illness persist	Sale/Dash to dog/cat eaters	Not applicable (I do not have animals)	Any Bush Meat eg bird, monkey, etc	Lassa Fever	Never	Always	Maybe	Proper sanitation of facilities	Financial constraints	Not Approved
18-24	Female	Single	Completed Secondary Education	Cooperate private sector	None	3-4	No	Educational institution	Hearing for the 1st time	Environmental health	Maybe	It promotes environmental sustainability	The integration of human, animal, and environmental health	Malaria	No	None of the above	Don't know	Don't know	Agree	Willing to support	Neutral	A little	Rarely	Take to veterinarian	Treat at home until pet recovers or dies	Always	Any Bush Meat eg bird, monkey, etc	COVID19	Rarely	Never	No	Pest control measures	Financial constraints	Not Approved
25-34	Female	Married	Completed Primary Education	Business man/woman	Animal Health	3-4	No	None	Poor	Economic health	No	I don't know	A focus on human health	Malaria	No	None of the above	Not sure	Neutral	Don't know	Willing to support	Neutral	A little	Never	Wait to recover with no action	Wait to recover with no action	Never	None	None	Never	Never	Maybe	Proper sanitation of facilities	Lack of knowledge, Financial constraints, Lack of resources	Not Approved
18-24	Male	Single	No formal education	Farmer	None	7-9	No	None	Hearing for the 1st time	Human health	No	I don't know	A focus on human health	Malaria	Don't know	None of the above	Don't know	Don't know	Don't know	Don’t know how to support	Neutral	No Idea	Daily	Treat at home until livestock recovers or dies	Sale/Dash to dog/cat eaters	Never	Cow, Ram, Pig, Any Bush Meat eg bird, monkey, etc	None	Always	Sometimes	No	Regular garbage disposal, Proper sanitation of facilities, Pest control measures	Financial constraints, Lack of resources	Not Approved
35-44	Female	Widowed	Completed Tertiary Education	Business man/woman	None	3-4	Maybe	Internet	Fair	Human health, Environmental health, Animal health	Maybe	It helps prevent zoonotic diseases, It promotes environmental sustainability, It improves overall public health	The integration of human, animal, and environmental health	Ebola, Rabies, Lassa Fever	Yes	Proper waste disposal, Maintaining personal hygiene	Important	Agree	Agree	Willing to support	Agree	A lot	Rarely	Take to veterinarian	Take to veterinarian	Never	Cow, Chicken, Ram, Pig, Rat, Dog, Any Bush Meat eg bird, monkey, etc	None	Always	Always	No	Regular garbage disposal, Proper sanitation of facilities, Safe water practices, Pest control measures	Lack of resources	Not Approved
25-34	Female	Single	Completed Tertiary Education	Civil servant	None	3-4	Yes	Educational institution	Fair	Human health, Environmental health, Animal health	Yes	It helps prevent zoonotic diseases, It promotes environmental sustainability, It improves overall public health	The integration of human, animal, and environmental health	Malaria, Ebola, Rabies, Lassa Fever	Yes	Vaccinating animals, Proper waste disposal, Maintaining personal hygiene	Important	Agree	Agree	Willing to support	Agree	A lot	Rarely	Take to veterinarian	Take to veterinarian	Rarely	Cow, Chicken, Ram, Pig, Any Bush Meat eg bird, monkey, etc	None	Always	Always	No	Regular garbage disposal, Proper sanitation of facilities, Safe water practices, Pest control measures	Financial constraints	Not Approved
25-34	Female	Single	Completed Secondary Education	Business man/woman	None	5-6	No	None	Hearing for the 1st time	Human health	No	I don't know	A focus on human health	Malaria	Yes	Vaccinating animals	Not sure	Neutral	Neutral	Willing to support	Neutral	No Idea	Daily	Slaughter for meal if illness persist	Sale/Dash to dog/cat eaters	Never	Cow, Chicken, Ram, Pig	Tuberculosis (TB), Anthrax	Sometimes	Always	No	Proper sanitation of facilities	Lack of knowledge, Financial constraints, Lack of resources	Not Approved
25-34	Male	Single	Completed Tertiary Education	Unemployed	None	1-2	Yes	Internet	Good	Human health, Animal health	Yes	It improves overall public health	The integration of human, animal, and environmental health	Cholera	Yes	Vaccinating animals, Proper waste disposal	Important	Possibly but not sure how	Don't know	Not supportive	Agree	A lot	Monthly	Take to veterinarian	Take to veterinarian	Never	Cow, Chicken, Ram	None	Often	Never	Yes	Regular garbage disposal, Proper sanitation of facilities, Safe water practices, Pest control measures	Lack of knowledge, Financial constraints, Lack of resources	Not Approved
55-64	Male	Married	Completed Postgraduate Education	Business man/woman	None	5-6	Maybe		Fair	Human health	Yes	It helps prevent zoonotic diseases	The integration of human, animal, and environmental health	Rabies, Cholera, Lassa Fever	Possibly, but not sure how	Proper waste disposal, Maintaining personal hygiene, None of the above	Important	Possibly but not sure how	Possibly but not sure how	Don’t know how to support	Agree	A lot	Rarely	Treat at home until livestock recovers or dies	Take to veterinarian	Always	Cow, Chicken, Ram, Pig	None	Sometimes	Sometimes	Yes	Proper sanitation of facilities, Safe water practices	Lack of resources, Cultural beliefs	Not Approved
18-24	Male	Single	Completed Tertiary Education	Unemployed	None	3-4	Maybe	Internet	Fair	Human health, Animal health	No	It improves overall public health	A focus on human health	Malaria	Yes	Vaccinating animals	Important	Neutral	Neutral	Willing to support	Neutral	No Idea	Never	Take to veterinarian	Take to veterinarian	Never	Cow, Chicken, Ram	None	Sometimes	Always	No	Regular garbage disposal, Proper sanitation of facilities	Lack of resources	Not Approved
35-44	Male	Married	Completed Secondary Education	Civil servant	None	3-4	Yes	Internet	Fair	Animal health	Yes	It helps prevent zoonotic diseases, It is cost-effective	The integration of human, animal, and environmental health	Rabies, Cholera, Lassa Fever	Yes	Proper waste disposal	Important	Possibly but not sure how	Possibly but not sure how	Don’t know how to support	Agree	A lot	Rarely	Take to veterinarian	Take to veterinarian	Always	Cow, Chicken, Ram	None	Rarely	Always	Yes	Safe water practices, Pest control measures	Lack of knowledge, Financial constraints	Not Approved
18-24	Female	Single	Completed Secondary Education	Unemployed	None	1-2	Maybe	Media (TV, radio, newspapers)	Good	Human health, Animal health	Maybe	It helps prevent zoonotic diseases, It improves overall public health	The integration of human, animal, and environmental health	Cholera	Possibly, but not sure how	Vaccinating animals, Proper waste disposal, Maintaining personal hygiene	Important	Agree	Agree	Supportive	Agree	A lot	Monthly	Take to veterinarian	Take to veterinarian	Never	Cow, Chicken, Ram	None	Often	Sometimes	Yes	Regular garbage disposal, Proper sanitation of facilities, Safe water practices, Pest control measures	Lack of knowledge, Financial constraints	Not Approved
18-24	Female	Single	Completed Secondary Education	Student	Human Health	3-4	Yes	Media (TV, radio, newspapers)	Good	Environmental health	Yes	It promotes environmental sustainability	A focus on animal health	Malaria, Cholera	Possibly, but not sure how	Vaccinating animals	Not sure	Possibly but not sure how	Agree	Not supportive	Neutral	A little	Weekly	Wait to recover with no action	Treat at home until pet recovers or dies	Always	Cow, Chicken, Ram	Lassa Fever, Brucellosis	Never	Sometimes	Maybe	Regular garbage disposal, Pest control measures	Lack of resources	Not Approved
35-44	Male	Married	Completed Secondary Education	Business man/woman	None	3-4	No	None	Hearing for the 1st time	Human health	No	It helps prevent zoonotic diseases	A focus on human health	Malaria	Don't know	Maintaining personal hygiene	Important	Neutral	Neutral	Willing to support	Neutral	No Idea	Daily	Wait to recover with no action	Sale/Dash to dog/cat eaters	Never	Cow, Chicken	None	Sometimes	Always	No	Regular garbage disposal, Proper sanitation of facilities	Lack of knowledge, Lack of resources	Not Approved
18-24	Female	Single	Completed Tertiary Education	Unemployed	None	1-2	Yes	Media (TV, radio, newspapers)	Fair	Human health, Animal health	Yes	It improves overall public health	The integration of human, animal, and environmental health	Cholera, Lassa Fever	Yes	Vaccinating animals	Important	Possibly but not sure how	Agree	Supportive	Agree	A lot	Rarely	Take to veterinarian	Take to veterinarian	Sometimes	Cow, Chicken, Ram	None	Sometimes	Sometimes	Yes	Regular garbage disposal, Proper sanitation of facilities	Financial constraints, Cultural beliefs	Not Approved
18-24	Male	Married	Completed Tertiary Education	Business man/woman	None	3-4	Yes	Internet	Good	Human health, Animal health	Yes	It helps prevent zoonotic diseases	The integration of human, animal, and environmental health	Ebola, Cholera, Lassa Fever	Yes	Vaccinating animals, Proper waste disposal, Maintaining personal hygiene	Important	Agree	Agree	Supportive	Agree	A lot	Rarely	Take to veterinarian	Take to veterinarian	Not applicable (I do not have animals)	Cow, Chicken, Ram	None	Sometimes	Sometimes	No	Regular garbage disposal, Proper sanitation of facilities, Safe water practices, Pest control measures	Cultural beliefs	Not Approved
25-34	Male	Single	Completed Tertiary Education	Civil servant	Human Health	5-6	No	Community meeting	Good	Economic health, Social health	Yes	It promotes environmental sustainability	The integration of human, animal, and environmental health	Malaria	No	Vaccinating animals	Don't know	Don't know	Possibly but not sure how	Don’t know how to support	Agree	Not at all	Rarely	Treat at home until livestock recovers or dies	Treat at home until pet recovers or dies	Never	Any Bush Meat eg bird, monkey, etc	Cholera, Rabies	Never	Always	Maybe	Regular garbage disposal	Cultural beliefs	Not Approved
18-24	Male	Single	No formal education	Unemployed	None	1-2	No	None	Fair	Human health, Animal health	No	It helps prevent zoonotic diseases, It improves overall public health	The integration of human, animal, and environmental health	Lassa Fever	Yes	Vaccinating animals, Proper waste disposal, Maintaining personal hygiene	Important	Possibly but not sure how	Neutral	Don’t know how to support	Agree	A lot	Rarely	Take to veterinarian	Take to veterinarian	Sometimes	Cow, Chicken, Ram	None	Often	Sometimes	Yes	Regular garbage disposal	Lack of resources	Not Approved
35-44	Female	Married	Completed Postgraduate Education	Civil servant	None	3-4	No	Educational institution	Fair	Animal health	No	It helps prevent zoonotic diseases, It promotes environmental sustainability, I don't know	A focus on environmental health	Ebola, Rabies, Cholera, Lassa Fever	No	Vaccinating animals	Important	Don't know	Agree	Supportive	Agree	A little	Weekly	Take to veterinarian	Take to veterinarian	Never	Pig, Rat, Any Bush Meat eg bird, monkey, etc	Ebola, Rabies	Rarely	Sometimes	No	Regular garbage disposal, Proper sanitation of facilities	Financial constraints, Lack of resources, Cultural beliefs	Not Approved
45-54	Female	Married	Completed Tertiary Education	Civil servant	None	5-6	Yes	Media (TV, radio, newspapers)	Good	Human health, Animal health	Yes	It improves overall public health	A focus on environmental health	Ebola, Cholera	Yes	Vaccinating animals	Important	Agree	Possibly but not sure how	Supportive	Agree	A lot	Monthly	Take to veterinarian	Take to veterinarian	Sometimes	Cow, Chicken, Ram	None	Sometimes	Sometimes	Yes	Safe water practices	Lack of resources	Not Approved
18-24	Male	Single	Completed Secondary Education	Unemployed	None	3-4	No		Hearing for the 1st time	Human health, Environmental health, Animal health	No	I don't know	A focus on human health	Malaria, Ebola, Rabies, Cholera, Lassa Fever	Yes	Vaccinating animals	Don't know	Agree	Agree	Supportive	Neutral	A little	Monthly	Take to veterinarian	Take to veterinarian	Sometimes	Cow, Chicken, Ram, Pig, Rat, Any Bush Meat eg bird, monkey, etc	None	Never	Always	No	Regular garbage disposal, Proper sanitation of facilities, Safe water practices, Pest control measures	Financial constraints, Lack of resources	Not Approved
45-54	Female	Single	No formal education	Farmer	None	7-9	No	None	Hearing for the 1st time	Human health	No	It helps prevent zoonotic diseases, I don't know	A focus on human health	Malaria	Yes	Maintaining personal hygiene	Not sure	Don't know	Don't know	Don’t know how to support	Neutral	No Idea	Daily	Wait to recover with no action	Wait to recover with no action	Never	Cow, Chicken, Ram, Rat, Any Bush Meat eg bird, monkey, etc	None	Always	Always	No	Regular garbage disposal, Proper sanitation of facilities	Lack of knowledge, Financial constraints, Lack of resources	Not Approved
35-44	Male	Married	Completed Tertiary Education	Unemployed	None	3-4	Yes	Internet	Good	Human health, Animal health	Maybe	It helps prevent zoonotic diseases, It improves overall public health	The integration of human, animal, and environmental health	Ebola	Yes	Proper waste disposal	Important	Agree	Agree	Supportive	Agree	A lot	Monthly	Take to veterinarian	Take to veterinarian	Always	Cow, Chicken, Ram	None	Often	Never	Yes	Regular garbage disposal, Proper sanitation of facilities	Lack of resources, Cultural beliefs	Not Approved
18-24	Male	Single	Completed Secondary Education	Farmer	None	3-4	No		Hearing for the 1st time	Human health, Environmental health, Animal health	No	I don't know	A focus on human health	Malaria, Ebola, Rabies, Cholera	Yes	Vaccinating animals, Proper waste disposal, Maintaining personal hygiene	Don't know	Agree	Agree	Supportive	Neutral	A little	Monthly	Take to veterinarian	Take to veterinarian	Always	Cow, Chicken, Ram, Pig, Rat, Dog, Any Bush Meat eg bird, monkey, etc	None	Never	Always	No	Regular garbage disposal, Proper sanitation of facilities, Safe water practices, Pest control measures	Financial constraints, Lack of resources	Not Approved
18-24	Female	Single	Completed Tertiary Education	Student	None	3-4	No	Media (TV, radio, newspapers)	Hearing for the 1st time	Environmental health	Yes	It helps prevent zoonotic diseases, It promotes environmental sustainability, It improves overall public health	The integration of human, animal, and environmental health	Malaria, Rabies, Cholera	Yes	Vaccinating animals, Proper waste disposal	Don't know	Don't know	Don't know	Willing to support	Neutral	A little	Rarely	Treat at home until livestock recovers or dies	Treat at home until pet recovers or dies	Sometimes	Cow, Chicken, Ram, Rat, Dog, Any Bush Meat eg bird, monkey, etc	None	Never	Always	No	Regular garbage disposal, Pest control measures		Not Approved
35-44	Male	Divorced	Completed Tertiary Education	Civil servant	None	7-9	No	None	Hearing for the 1st time	Human health	No	It helps prevent zoonotic diseases	A focus on human health	Malaria	Yes	Vaccinating animals	Not sure	Don't know	Don't know	Don’t know how to support	Agree	A lot	Rarely	Slaughter for meal if illness persist	Sale/Dash to dog/cat eaters	Sometimes	Cow, Chicken, Ram	Tuberculosis (TB)	Always	Always	No	Regular garbage disposal, Proper sanitation of facilities, Safe water practices	Lack of knowledge, Lack of resources	Not Approved
35-44	Female	Married	Completed Tertiary Education	Business man/woman	None	5-6	Maybe	Internet	Good	Human health, Animal health	Yes	It helps prevent zoonotic diseases	The integration of human, animal, and environmental health	Ebola	Yes	Vaccinating animals, Proper waste disposal, Maintaining personal hygiene	Important	Agree	Possibly but not sure how	Supportive	Agree	A lot	Rarely	Take to veterinarian	Take to veterinarian	Sometimes	Cow, Chicken, Ram	None	Sometimes	Sometimes	Yes	Proper sanitation of facilities, Safe water practices, Pest control measures	Lack of resources	Not Approved
35-44	Female	Married	Completed Postgraduate Education	Cooperate private sector	Human Health	5-6	Yes	Community meeting	Good	Human health, Economic health, Environmental health, Animal health	Yes	It helps prevent zoonotic diseases, It promotes environmental sustainability, It improves overall public health, It is cost-effective	The integration of human, animal, and environmental health	Malaria, Ebola, Rabies, Cholera, Lassa Fever	Yes	Vaccinating animals, Proper waste disposal	Important	Agree	Possibly but not sure how	Supportive	Agree	A lot	Daily	Take to veterinarian	Take to veterinarian	Always	Cow, Chicken	None	Never	Always	Yes	Regular garbage disposal, Proper sanitation of facilities, Safe water practices, Pest control measures	Financial constraints	Not Approved
25-34	Female	Married	Completed Tertiary Education	Business man/woman	None	3-4	No	Media (TV, radio, newspapers)	Hearing for the 1st time	Human health	No	It improves overall public health	A focus on human health	Malaria, Cholera	Don't know	Proper waste disposal, Maintaining personal hygiene	Don't know	Don't know	Don't know	Don’t know how to support	Neutral	A little	Daily	Treat at home until livestock recovers or dies	Take to veterinarian	Sometimes	Cow, Chicken, Ram, Rat	None	Never	Always	No	Regular garbage disposal	Lack of knowledge	Not Approved
35-44	Female	Married	Completed Tertiary Education	Business man/woman	None	5-6	No		Hearing for the 1st time	Human health	No	I don't know	A focus on human health	Malaria, Cholera	Don't know	Proper waste disposal, Maintaining personal hygiene	Don't know	Don't know	Don't know	Don’t know how to support	Neutral	A little	Rarely	Slaughter for meal if illness persist	Sale/Dash to dog/cat eaters	Never	Cow, Chicken, Ram, Rat, Any Bush Meat eg bird, monkey, etc	None	Never	Always	No	Regular garbage disposal, Proper sanitation of facilities, Safe water practices, Pest control measures	Financial constraints	Not Approved
55-64	Male	Married	Completed Postgraduate Education	Civil servant	None	7-9	No	Internet	Hearing for the 1st time	Environmental health	Maybe	I don't know	The integration of human, animal, and environmental health	Ebola, Rabies, Lassa Fever	Don't know	Proper waste disposal	Not important	Don't know	Don't know	Don’t know how to support	Neutral	Not at all	Never	Treat at home until livestock recovers or dies	Sale/Dash to dog/cat eaters	Sometimes	Cow, Chicken, Ram, Pig	None	Never	Sometimes	No	Regular garbage disposal	Lack of knowledge	Not Approved
25-34	Female	Married	Completed Tertiary Education	Unemployed	None	3-4	Yes	Internet	Good	Human health, Animal health	Yes	It helps prevent zoonotic diseases, It improves overall public health	The integration of human, animal, and environmental health	Ebola	Don't know	Vaccinating animals, Proper waste disposal	Important	Agree	Agree	Supportive	Agree	A lot	Rarely	Treat at home until livestock recovers or dies	Take to veterinarian	Sometimes	Cow, Chicken, Ram	None	Sometimes	Never	Yes	Regular garbage disposal, Proper sanitation of facilities	Lack of knowledge	Not Approved
18-24	Male	Single	Completed Secondary Education	Student	None	3-4	No	Media (TV, radio, newspapers)	Hearing for the 1st time	Human health	No	It improves overall public health	A focus on human health	Malaria, Ebola, Rabies, Cholera	Possibly, but not sure how	Maintaining personal hygiene, None of the above	Not important	Don't know	Don't know	Willing to support	Neutral	A little	Rarely	Slaughter for meal if illness persist	Take to veterinarian	Sometimes	Cow, Chicken, Ram	Lassa Fever, None	Never	Sometimes	No	Regular garbage disposal	Lack of knowledge, Financial constraints, Lack of resources	Not Approved
25-34	Female	Single	Completed Tertiary Education	Business man/woman	None	7-9	No		Hearing for the 1st time	Human health	No	It improves overall public health	A focus on human health	Malaria	Yes	Vaccinating animals	Don't know	Neutral	Neutral	Willing to support	Neutral	No Idea	Rarely	Wait to recover with no action	Sale/Dash to dog/cat eaters	Never	Cow, Chicken	None	Always	Always	No	Regular garbage disposal, Proper sanitation of facilities	Lack of knowledge, Financial constraints, Lack of resources	Not Approved
45-54	Female	Married	Completed Tertiary Education	Cooperate private sector	None	3-4	No	Healthcare provider	Good	Human health, Animal health	Yes	It helps prevent zoonotic diseases	A focus on environmental health	Cholera	Possibly, but not sure how	Proper waste disposal	Important	Possibly but not sure how	Agree	Supportive	Agree	A lot	Monthly	Slaughter for meal if illness persist	Take to veterinarian	Never	Cow, Ram	None	Rarely	Sometimes	Yes	Proper sanitation of facilities	Lack of knowledge	Not Approved
25-34	Female	Married	Completed Postgraduate Education	Business man/woman	None	3-4	Maybe	Internet	Fair	Human health, Environmental health	Maybe	It promotes environmental sustainability, It improves overall public health	The integration of human, animal, and environmental health	Malaria, Ebola, Rabies, Cholera	Yes	Proper waste disposal, Maintaining personal hygiene	Not sure	Agree	Don't know	Don’t know how to support	Neutral	A little	Rarely	Take to veterinarian	Take to veterinarian	Sometimes	Chicken, Any Bush Meat eg bird, monkey, etc	None	Never	Always	No	Regular garbage disposal, Proper sanitation of facilities, Safe water practices	Lack of knowledge	Not Approved
25-34	Female	Married	Completed Tertiary Education	Cooperate private sector	None	3-4	Yes	Community meeting	Fair	Human health, Environmental health	Yes	It helps prevent zoonotic diseases, It promotes environmental sustainability, It improves overall public health	The integration of human, animal, and environmental health	Malaria, Rabies, Lassa Fever	Yes	Vaccinating animals, Proper waste disposal	Not sure	Possibly but not sure how	Don't know	Don’t know how to support	Neutral	A little	Rarely	Treat at home until livestock recovers or dies	Take to veterinarian	Sometimes	Cow, Chicken, Ram	None	Never	Sometimes	No	Regular garbage disposal		Not Approved
35-44	Male	Divorced	Completed Postgraduate Education	Business man/woman	None	5-6	Yes	Internet	Fair	Human health, Environmental health	No	It promotes environmental sustainability, It improves overall public health	The integration of human, animal, and environmental health	Malaria, Lassa Fever	No	Vaccinating animals, Proper waste disposal	Not sure	Possibly but not sure how	Possibly but not sure how	Don’t know how to support	Neutral	A little	Never	Slaughter for meal if illness persist	Take to veterinarian	Sometimes	Cow, Chicken, Ram, Pig, Rat, Any Bush Meat eg bird, monkey, etc	None	Never	Always	No	Regular garbage disposal, Proper sanitation of facilities	Financial constraints	Not Approved
18-24	Male	Married	Completed Postgraduate Education	Cooperate private sector	None	3-4	No		Hearing for the 1st time	Environmental health	Maybe	I don't know	A focus on environmental health	Cholera	Yes	Vaccinating animals	Not important	Agree	Don't know	Don’t know how to support	Neutral	Not at all	Daily	Treat at home until livestock recovers or dies	Take to veterinarian	Sometimes	Cow, Chicken	Tuberculosis (TB)	Often	Always	No	Regular garbage disposal, Proper sanitation of facilities, Safe water practices, Pest control measures	Lack of resources	Not Approved
18-24	Female	Single	Completed Secondary Education	Student	None	5-6	Yes	Healthcare provider	Hearing for the 1st time	Economic health	Yes	It promotes environmental sustainability	A focus on animal health	Lassa Fever	Possibly, but not sure how	Vaccinating animals	Not sure	Possibly but not sure how	Neutral	Supportive	Neutral	Not at all	Weekly	Wait to recover with no action	Slaughter for meal if illness persist	Always	Cow, Chicken, Ram, Any Bush Meat eg bird, monkey, etc	Lassa Fever	Sometimes	Never	Maybe	Safe water practices	Lack of resources	Not Approved
18-24	Female	Single	Completed Secondary Education	Unemployed	None	5-6	No	Educational institution	Hearing for the 1st time	Human health	No	I don't know	A focus on animal health	Ebola	Possibly, but not sure how	Vaccinating animals	Don't know	Possibly but not sure how	Agree	Supportive	Agree	A little	Never	Take to veterinarian	Take to veterinarian	Never	Any Bush Meat eg bird, monkey, etc	Lassa Fever	Rarely	Never	No	Regular garbage disposal	Financial constraints	Not Approved
18-24	Female	Single	Completed Secondary Education	Unemployed	None	3-4	No	Media (TV, radio, newspapers)	Hearing for the 1st time	Social health	Maybe	It promotes environmental sustainability	The integration of human, animal, and environmental health	Malaria	Don't know	Proper waste disposal	Don't know	Don't know	Don't know	Don’t know how to support	Agree	Not at all	Never	Take to veterinarian	Take to veterinarian	Sometimes	Any Bush Meat eg bird, monkey, etc	None	Never	Never	Maybe	Regular garbage disposal	Lack of resources	Not Approved
25-34	Male	Single	Completed Secondary Education	Unemployed	None	3-4	Yes	Media (TV, radio, newspapers)	Good	Human health, Animal health	Yes	It helps prevent zoonotic diseases, It improves overall public health	The integration of human, animal, and environmental health	Cholera	Yes	Vaccinating animals, Proper waste disposal	Important	Agree	Agree	Supportive	Agree	A lot	Rarely	Take to veterinarian	Take to veterinarian	Sometimes	Cow, Chicken, Ram	None	Often	Never	Yes	Regular garbage disposal, Proper sanitation of facilities, Safe water practices, Pest control measures	Lack of knowledge, Financial constraints, Cultural beliefs	Not Approved
45-54	Male	Married	Completed Tertiary Education	Cooperate private sector	Human Health	3-4	Yes	Internet	Good	Human health, Economic health, Environmental health, Animal health	Yes	It helps prevent zoonotic diseases, It promotes environmental sustainability, It improves overall public health	The integration of human, animal, and environmental health	Cholera	Yes	Vaccinating animals, Proper waste disposal, Maintaining personal hygiene	Important	Agree	Agree	Don’t know how to support	Agree	A lot	Rarely	Take to veterinarian	Take to veterinarian	Never	Cow, Chicken	None	Often	Never	Yes	Regular garbage disposal, Proper sanitation of facilities, Safe water practices	Lack of knowledge, Financial constraints, Lack of resources, Cultural beliefs	Not Approved
25-34	Female	Single	Completed Secondary Education	Business man/woman	None	7-9	Yes		Fair	Human health, Environmental health, Animal health	Yes	It helps prevent zoonotic diseases, It promotes environmental sustainability, It improves overall public health	The integration of human, animal, and environmental health	Malaria, Ebola, Cholera, Lassa Fever	Yes	Vaccinating animals, Proper waste disposal, Maintaining personal hygiene	Important	Agree	Agree	Willing to support	Agree	A lot	Daily	Wait to recover with no action	Sale/Dash to dog/cat eaters	Never	Cow, Chicken, Ram	None	Always	Always	Yes	Regular garbage disposal, Proper sanitation of facilities, Safe water practices, Pest control measures	Financial constraints, Lack of resources	Not Approved
45-54	Female	Married	Completed Postgraduate Education	Business man/woman	None	3-4	Yes	Educational institution	Hearing for the 1st time	Environmental health	No	It promotes environmental sustainability	The integration of human, animal, and environmental health	Lassa Fever	Don't know	Vaccinating animals	Not sure	Possibly but not sure how	Possibly but not sure how	Don’t know how to support	Agree	Not at all	Weekly	Wait to recover with no action	Sale/Dash to dog/cat eaters	Sometimes	Any Bush Meat eg bird, monkey, etc	None	Never	Always	Maybe	Pest control measures	Financial constraints	Not Approved
25-34	Male	Single	Completed Postgraduate Education	Business man/woman	None	5-6	No		Poor	Human health	No	It improves overall public health	A focus on human health	Malaria, Ebola, Rabies, Cholera, Lassa Fever	Don't know	Proper waste disposal, Maintaining personal hygiene	Don't know	Don't know	Don't know	Don’t know how to support	Neutral	A little	Rarely	Wait to recover with no action	Take to veterinarian	Sometimes	Cow, Chicken, Ram	None	Never	Sometimes	No	Regular garbage disposal, Proper sanitation of facilities, Safe water practices, Pest control measures	Lack of knowledge	Not Approved
18-24	Male	Married	Completed Postgraduate Education	Cooperate private sector	Human Health	3-4	Yes	Internet	Hearing for the 1st time	Social health	Maybe	It improves overall public health	A focus on environmental health	Ebola	Yes	Maintaining personal hygiene	Important	Agree	Neutral	Supportive	Agree	Not at all	Monthly	Slaughter for meal if illness persist	Take to veterinarian	Never	Dog	Lassa Fever	Sometimes	Never	Maybe	Safe water practices	Lack of resources	Not Approved
35-44	Male	Married	Completed Tertiary Education	Civil servant	Environmental health	3-4	No	Educational institution	Good	Environmental health	No	It promotes environmental sustainability	The integration of human, animal, and environmental health	Lassa Fever	Don't know	Maintaining personal hygiene	Don't know	Possibly but not sure how	Neutral	Not supportive	Agree	Not at all	Never	Take to veterinarian	Take to veterinarian	Not applicable (I do not have animals)	Cow	Lassa Fever	Never	Sometimes	No	Regular garbage disposal	Financial constraints, Lack of resources	Not Approved
18-24	Female	Single	Completed Tertiary Education	Unemployed	None	3-4	Maybe	Educational institution	Fair	Economic health	Maybe	It helps prevent zoonotic diseases	A focus on human health	Malaria, Ebola, Rabies, Cholera	Possibly, but not sure how	Vaccinating animals	Not sure	Possibly but not sure how	Don't know	Don’t know how to support	Neutral	Not at all	Rarely	Take to veterinarian	Take to veterinarian	Sometimes	Chicken	None	Often	Never	No	Regular garbage disposal, Proper sanitation of facilities, Safe water practices, Pest control measures	Lack of knowledge	Not Approved
35-44	Female	Married	Completed Postgraduate Education	Cooperate private sector	Environmental health	3-4	Yes	Educational institution	Hearing for the 1st time	Economic health	No	I don't know	The integration of human, animal, and environmental health	Malaria	No	Vaccinating animals	Don't know	Agree	Agree	Supportive	Agree	Not at all	Never	Take to veterinarian	Treat at home until pet recovers or dies	Never	Any Bush Meat eg bird, monkey, etc	None	Rarely	Never	No	Regular garbage disposal	Financial constraints	Not Approved
35-44	Female	Married	Completed Postgraduate Education	Business man/woman	None	5-6	No		Hearing for the 1st time	Human health	No	I don't know	A focus on human health	Malaria	Possibly, but not sure how	None of the above	Not sure	Agree	Neutral	Don’t know how to support	Disagree	A lot	Daily	Treat at home until livestock recovers or dies	Take to veterinarian	Sometimes	Cow, Chicken, Ram	None	Often	Always	No	Regular garbage disposal, Proper sanitation of facilities, Safe water practices, Pest control measures	Lack of knowledge	Not Approved
25-34	Male	Married	Completed Postgraduate Education	Civil servant	None	10+	Maybe	Media (TV, radio, newspapers)	Good	Animal health	No	It promotes environmental sustainability	The integration of human, animal, and environmental health	Lassa Fever	Possibly, but not sure how	Vaccinating animals	Don't know	Agree	Neutral	Not supportive	Neutral	Not at all	Rarely	Take to veterinarian	Take to veterinarian	Sometimes	Any Bush Meat eg bird, monkey, etc	None	Never	Never	Maybe	Regular garbage disposal	Financial constraints	Not Approved
55-64	Male	Widowed	Completed Postgraduate Education	Unemployed	None	7-9	Yes	Healthcare provider	Fair	Environmental health	No	It promotes environmental sustainability, It improves overall public health	A focus on environmental health	Cholera	Yes	None of the above	Don't know	Agree	Don't know	Don’t know how to support	Agree	A lot	Never	Treat at home until livestock recovers or dies	Treat at home until pet recovers or dies	Never	Cow, Chicken, Ram	None	Sometimes	Sometimes	Maybe	Regular garbage disposal, Proper sanitation of facilities, Safe water practices, Pest control measures	Lack of resources, Cultural beliefs	Not Approved
45-54	Male	Divorced	Completed Postgraduate Education	Civil servant	None	5-6	No		Hearing for the 1st time	Human health	Maybe	It helps prevent zoonotic diseases	A focus on human health	Malaria	Yes	Vaccinating animals, Proper waste disposal, Maintaining personal hygiene	Important	Neutral	Neutral	Don’t know how to support	Neutral	Not at all	Never	Treat at home until livestock recovers or dies	Treat at home until pet recovers or dies	Never	Chicken	None	Never	Sometimes	No	Regular garbage disposal, Proper sanitation of facilities, Safe water practices, Pest control measures	Lack of knowledge	Not Approved
18-24	Male	Single	Completed Secondary Education	Student	None	3-4	No	Educational institution	Hearing for the 1st time	Social health	No	It helps prevent zoonotic diseases, It promotes environmental sustainability	The integration of human, animal, and environmental health	Cholera	Possibly, but not sure how	Vaccinating animals	Don't know	Don't know	Agree	Supportive	Agree	Not at all	Never	Take to veterinarian	Take to veterinarian	Never	Dog	None	Never	Never	Maybe	Regular garbage disposal	Financial constraints	Not Approved
35-44	Male	Divorced	Completed Postgraduate Education	Civil servant	None	5-6	Yes	Healthcare provider	Good	Human health, Economic health, Environmental health, Animal health	Yes	It helps prevent zoonotic diseases, It promotes environmental sustainability, It improves overall public health	The integration of human, animal, and environmental health	Malaria, Ebola, Rabies, Cholera, Lassa Fever	Yes	Vaccinating animals, Proper waste disposal, Maintaining personal hygiene	Important	Agree	Agree	Don’t know how to support	Neutral	A little	Never	Treat at home until livestock recovers or dies	Treat at home until pet recovers or dies	Never	Cow, Chicken, Ram	Lassa Fever, Brucellosis	Rarely	Sometimes	No	Regular garbage disposal, Proper sanitation of facilities, Safe water practices, Pest control measures	Financial constraints	Not Approved
35-44	Female	Single	Completed Postgraduate Education	Student	Environmental health	3-4	Yes	Educational institution	Hearing for the 1st time	Environmental health	No	I don't know	The integration of human, animal, and environmental health	Malaria	Don't know	Vaccinating animals	Not sure	Possibly but not sure how	Neutral	Supportive	Agree	Not at all	Never	Take to veterinarian	Treat at home until pet recovers or dies	Sometimes	Rat	None	Rarely	Never	No	Regular garbage disposal	Lack of resources	Not Approved
25-34	Female	Married	Completed Postgraduate Education	Civil servant	None	5-6	No	Healthcare provider	Fair	Human health, Economic health, Environmental health, Animal health	Yes	It helps prevent zoonotic diseases, It promotes environmental sustainability, It improves overall public health	The integration of human, animal, and environmental health	Malaria, Ebola, Rabies, Cholera, Lassa Fever	Yes	Vaccinating animals, Proper waste disposal, Maintaining personal hygiene	Important	Agree	Neutral	Willing to support	Agree	A lot	Daily	Slaughter for meal if illness persist	Take to veterinarian	Sometimes	Chicken, Pig, Dog, Any Bush Meat eg bird, monkey, etc	Tuberculosis (TB)	Sometimes	Always	No	Regular garbage disposal, Proper sanitation of facilities, Safe water practices, Pest control measures	Financial constraints	Not Approved
25-34	Male	Married	Completed Tertiary Education	Cooperate private sector	None	5-6	No		Hearing for the 1st time	Human health, Economic health, Environmental health, Animal health	Yes	It improves overall public health	The integration of human, animal, and environmental health	Malaria, Ebola, Rabies, Cholera, Lassa Fever	Yes	Vaccinating animals, Proper waste disposal, Maintaining personal hygiene	Important	Agree	Neutral	Not supportive	Agree	A lot	Rarely	Slaughter for meal if illness persist	Take to veterinarian	Not applicable (I do not have animals)	Cow, Chicken, Ram, Pig, Rat, Any Bush Meat eg bird, monkey, etc	None	Always	Always	No	Regular garbage disposal, Proper sanitation of facilities, Safe water practices, Pest control measures	Financial constraints	Not Approved
18-24	Male	Single	Completed Secondary Education	Student	Human Health	5-6	No	Media (TV, radio, newspapers)	Hearing for the 1st time	Social health	Yes	It helps prevent zoonotic diseases, It promotes environmental sustainability	The integration of human, animal, and environmental health	Lassa Fever	Possibly, but not sure how	Proper waste disposal	Not sure	Disagree	Neutral	Don’t know how to support	Agree	Not at all	Rarely	Take to veterinarian	Take to veterinarian	Sometimes	Rat	None	Always	Sometimes	No	Proper sanitation of facilities, Pest control measures	Financial constraints	Not Approved
25-34	Female	Married	Completed Secondary Education	Unemployed	None	3-4	Maybe	Media (TV, radio, newspapers)	Hearing for the 1st time	Social health	Yes	It promotes environmental sustainability	The integration of human, animal, and environmental health	Malaria	Possibly, but not sure how	Proper waste disposal	Don't know	Don't know	Don't know	Don’t know how to support	Agree	Not at all	Never	Take to veterinarian	Take to veterinarian	Never	Any Bush Meat eg bird, monkey, etc		Never	Always	Maybe	Pest control measures	Financial constraints	Not Approved
18-24	Male	Single	Completed Tertiary Education	Student	None	3-4	Yes	Community meeting	Hearing for the 1st time	Environmental health	No	It promotes environmental sustainability	The integration of human, animal, and environmental health	Malaria	Don't know	None of the above	Don't know	Don't know	Agree	Supportive	Agree	Not at all	Never	Take to veterinarian	Treat at home until pet recovers or dies	Sometimes	Dog	None	Never	Never	No	Pest control measures	Financial constraints	Not Approved
35-44	Female	Divorced	Completed Tertiary Education	Civil servant	None	5-6	Maybe	Internet	Poor	Human health	Maybe	It helps prevent zoonotic diseases, It promotes environmental sustainability	The integration of human, animal, and environmental health	Malaria, Ebola, Rabies, Lassa Fever	Yes	Maintaining personal hygiene	Not sure	Neutral	Neutral	Willing to support	Neutral	No Idea	Daily	Wait to recover with no action	Sale/Dash to dog/cat eaters	Never	Cow, Chicken, Ram	Tuberculosis (TB)	Sometimes	Always	No	Proper sanitation of facilities, Safe water practices	Lack of knowledge, Financial constraints	Not Approved
25-34	Male	Single	Completed Postgraduate Education	Business man/woman	None	5-6	Yes	Media (TV, radio, newspapers)	Good	Human health	Yes	It improves overall public health	The integration of human, animal, and environmental health	Ebola	Yes	Vaccinating animals, Maintaining personal hygiene	Important	Agree	Agree	Supportive	Agree	A lot	Rarely	Take to veterinarian	Take to veterinarian	Always	Cow, Chicken, Ram	None	Always	Always	Yes	Regular garbage disposal, Proper sanitation of facilities, Pest control measures	Lack of knowledge, Financial constraints, Lack of resources, Cultural beliefs	Not Approved
18-24	Male	Single	Completed Secondary Education	Student	None	5-6	Yes	Internet	Good	Human health	No	It helps prevent zoonotic diseases	The integration of human, animal, and environmental health	Malaria	Possibly, but not sure how	Vaccinating animals	Important	Possibly but not sure how	Possibly but not sure how	Willing to support	Agree	A lot	Rarely	Treat at home until livestock recovers or dies	Take to veterinarian	Sometimes	Cow, Chicken, Ram	None	Always	Always	No	Regular garbage disposal, Proper sanitation of facilities, Safe water practices, Pest control measures	Financial constraints, Lack of resources	Not Approved
35-44	Female	Married	Completed Tertiary Education	Civil servant	None	5-6	Yes	Media (TV, radio, newspapers)	Good	Human health	Yes	It helps prevent zoonotic diseases	A focus on environmental health	Malaria, Cholera	Possibly, but not sure how	Vaccinating animals, Proper waste disposal, Maintaining personal hygiene	Important	Agree	Neutral	Not supportive	Agree	A lot	Daily	Slaughter for meal if illness persist	Take to veterinarian	Always	Cow, Chicken, Ram, Any Bush Meat eg bird, monkey, etc	Cholera	Always	Always	No	Regular garbage disposal, Proper sanitation of facilities, Safe water practices, Pest control measures	Lack of knowledge, Lack of resources, Cultural beliefs	Not Approved
25-34	Female	Married	Completed Tertiary Education	Business man/woman	None	3-4	Maybe	A friend	Good	Human health, Environmental health, Animal health	No	I don't know	The integration of human, animal, and environmental health	Malaria, Ebola, Rabies, Lassa Fever	Yes	None of the above	Important	Agree	Agree	Willing to support	Agree	A lot	Daily	Take to veterinarian	Take to veterinarian	Always	Any Bush Meat eg bird, monkey, etc	None	Always	Always	Yes	Regular garbage disposal, Proper sanitation of facilities, Safe water practices, Pest control measures	Lack of knowledge, Financial constraints, Lack of resources, Cultural beliefs	Not Approved
25-34	Female	Single	Completed Secondary Education	Student	None	10+	Yes	Internet	Fair	Environmental health	Yes	It helps prevent zoonotic diseases	The integration of human, animal, and environmental health	Ebola	Yes	Proper waste disposal	Important	Agree	Neutral	Don’t know how to support	Agree	A lot	Daily	Take to veterinarian	Take to veterinarian	Always	Cow	None	Always	Always	No	Safe water practices	Financial constraints	Not Approved
18-24	Female	Single	Completed Postgraduate Education	Student	None	5-6	No	None	Hearing for the 1st time	Human health	No	I don't know	The integration of human, animal, and environmental health	Ebola	Possibly, but not sure how	None of the above	Important	Agree	Don't know	Willing to support	Agree	A lot	Rarely	Take to veterinarian	Take to veterinarian	Not applicable (I do not have animals)	Cow, Chicken, Pig, Dog	None	Always	Sometimes	Yes	Regular garbage disposal, Proper sanitation of facilities, Safe water practices, Pest control measures	Lack of knowledge, Financial constraints, Lack of resources, Cultural beliefs	Not Approved
18-24	Male	Single	Completed Tertiary Education	Student	None	1-2	Yes	Educational institution	Good	Environmental health	Yes	It promotes environmental sustainability	A focus on environmental health	Malaria	Yes	Proper waste disposal	Important	Possibly but not sure how	Neutral	Supportive	Agree	A little	Never	Treat at home until livestock recovers or dies	Take to veterinarian	Never	Pig	None	Sometimes	Always	Yes	Pest control measures	Lack of resources	Not Approved
25-34	Female	Single	Completed Tertiary Education	Unemployed	None	1-2	Yes	Educational institution	Good	Environmental health	Yes	It helps prevent zoonotic diseases	A focus on animal health	Malaria	Yes	Proper waste disposal	Important	Agree	Agree	Supportive	Agree	A little	Daily	Take to veterinarian	Take to veterinarian	Always	Cow	None	Always	Sometimes	Maybe	Regular garbage disposal, Proper sanitation of facilities, Safe water practices, Pest control measures	Lack of knowledge, Financial constraints, Lack of resources, Cultural beliefs	Not Approved
25-34	Male	Single	Completed Tertiary Education	Unemployed	None	5-6	Yes	Internet	Fair	Economic health	Yes	It improves overall public health	A focus on human health	Malaria	Yes	None of the above	Important	Agree	Agree	Supportive	Neutral	Not at all	Daily	Treat at home until livestock recovers or dies	Take to veterinarian	Always	Ram	None	Always	Always	Yes	Proper sanitation of facilities	Financial constraints	Not Approved
18-24	Female	Single	Completed Primary Education	Farmer	None	5-6	Maybe	Educational institution	Fair	Human health, Environmental health	No	It helps prevent zoonotic diseases, It promotes environmental sustainability	A focus on human health	Ebola, Cholera, Lassa Fever	Yes	Vaccinating animals, Proper waste disposal, Maintaining personal hygiene	Important	Neutral	Disagree	Don’t know how to support	Agree	A lot	Weekly	Take to veterinarian	Sale/Dash to dog/cat eaters	Always	Cow, Chicken, Ram, Any Bush Meat eg bird, monkey, etc	Cholera	Sometimes	Always	Maybe	Safe water practices	Lack of knowledge, Financial constraints, Lack of resources, Cultural beliefs	Not Approved
18-24	Male	Single	Completed Secondary Education	Student	Environmental health	5-6	No	Media (TV, radio, newspapers)	Fair	Environmental health	Yes	It helps prevent zoonotic diseases	A focus on environmental health	Malaria	Yes	None of the above	Important	Agree	Agree	Supportive	Agree	A little	Daily	Slaughter for meal if illness persist	Slaughter for meal if illness persist	Sometimes	Cow, Chicken, Ram	None	Never	Always	Yes	Safe water practices	Cultural beliefs	Not Approved
18-24	Male	Single	Completed Secondary Education	Business man/woman	None	7-9	Yes	Internet	Fair	Economic health	Yes	It helps prevent zoonotic diseases	The integration of human, animal, and environmental health	Malaria	No	Maintaining personal hygiene	Important	Agree	Agree	Supportive	Agree	A lot	Rarely	Take to veterinarian	Take to veterinarian	Always	Chicken	Tuberculosis (TB)	Never	Always	Yes	Proper sanitation of facilities	Lack of knowledge	Not Approved
25-34	Male	Single	Completed Secondary Education	Student	None	1-2	Yes	Media (TV, radio, newspapers)	Fair	Environmental health	Yes	It promotes environmental sustainability	A focus on environmental health	Malaria	Yes	Vaccinating animals	Important	Agree	Agree	Supportive	Agree	A lot	Daily	Take to veterinarian	Treat at home until pet recovers or dies	Always	Cow	Lassa Fever	Always	Never	Yes	Proper sanitation of facilities	Lack of resources	Not Approved
25-34	Female	Single	Completed Postgraduate Education	Farmer	None	5-6	No	Internet	Good	Environmental health	No	It is cost-effective	The integration of human, animal, and environmental health	Malaria	Yes	Proper waste disposal	Important	Agree	Agree	Supportive	Agree	A little	Rarely	Wait to recover with no action	Take to veterinarian	Always	Cow	COVID19	Always	Sometimes	Yes	Safe water practices	Lack of knowledge	Not Approved
18-24	Female	Single	Completed Secondary Education	Student	None	1-2	Yes	Internet	Good	Environmental health	Yes	It promotes environmental sustainability	A focus on environmental health	Malaria	Possibly, but not sure how	Proper waste disposal	Important	Agree	Agree	Not supportive	Agree	A lot	Daily	Take to veterinarian	Take to veterinarian	Always	Any Bush Meat eg bird, monkey, etc	Anthrax	Rarely	Sometimes	No	Regular garbage disposal	Lack of knowledge	Not Approved
18-24	Male	Single	Completed Secondary Education	Student	None	3-4	Yes	Media (TV, radio, newspapers)	Good	Human health	Yes	It helps prevent zoonotic diseases	The integration of human, animal, and environmental health	Malaria	No	None of the above	Important	Agree	Agree	Supportive	Agree	A lot	Daily	Slaughter for meal if illness persist	Treat at home until pet recovers or dies	Sometimes	Cow	Sleeping Sickness (Trypanosomiasis)	Sometimes	Always	No	Proper sanitation of facilities	Cultural beliefs	Not Approved
25-34	Male	Single	Completed Secondary Education	Student	None	3-4	No	Community meeting	Good	Economic health	Yes	It improves overall public health	A focus on environmental health	Malaria	Yes	None of the above	Important	Agree	Agree	Supportive	Agree	A lot	Monthly	Take to veterinarian	Treat at home until pet recovers or dies	Always	Ram	None	Always	Always	No	Regular garbage disposal	Lack of knowledge	Not Approved
25-34	Male	Single	Completed Secondary Education	Business man/woman	None	5-6	No		Fair	Human health	No	It helps prevent zoonotic diseases	The integration of human, animal, and environmental health	Cholera	No	Proper waste disposal, Maintaining personal hygiene	Not important	Disagree	Don't know	Willing to support	Agree	A little	Daily	Treat at home until livestock recovers or dies	Sale/Dash to dog/cat eaters	Sometimes	Chicken	Ebola	Always	Sometimes	Yes	Regular garbage disposal	Lack of resources, Cultural beliefs	Not Approved
25-34	Male	Single	Completed Primary Education	Student	None	3-4	No		Hearing for the 1st time	Environmental health	No	I don't know	The integration of human, animal, and environmental health	Malaria	Don't know	Maintaining personal hygiene	Important	Don't know	Agree	Supportive	Agree	A little	Daily	Take to veterinarian	Take to veterinarian	Always	Chicken, Ram	Sleeping Sickness (Trypanosomiasis)	Often	Never	No	Regular garbage disposal		Not Approved
18-24	Female	Single	Completed Primary Education	Student	None	3-4	No		Poor	Economic health	Yes	It helps prevent zoonotic diseases	The integration of human, animal, and environmental health	Cholera	Yes	Vaccinating animals, Proper waste disposal	Important	Agree	Neutral	Don’t know how to support	Neutral	A lot	Daily	Treat at home until livestock recovers or dies	Take to veterinarian	Sometimes	Cow, Chicken, Ram		Sometimes	Sometimes	No	Regular garbage disposal		Not Approved
18-24	Male	Single	Completed Secondary Education	Student	None	3-4	Yes	Media (TV, radio, newspapers)	Poor	Social health	Yes	It promotes environmental sustainability	A focus on environmental health	Malaria	Don't know	Proper waste disposal	Don't know	Disagree	Agree	Supportive	Agree	Not at all	Rarely	Take to veterinarian	Slaughter for meal if illness persist	Sometimes	Any Bush Meat eg bird, monkey, etc	Sleeping Sickness (Trypanosomiasis)	Never	Always	No	Safe water practices	Lack of knowledge	Not Approved
18-24	Female	Single	Completed Tertiary Education	Student	None	1-2	Yes	Internet	Good	Environmental health	Yes	It improves overall public health	A focus on animal health	Malaria	Yes	Proper waste disposal	Not sure	Neutral	Agree	Supportive	Agree	A lot	Daily	Treat at home until livestock recovers or dies	Take to veterinarian	Always	Ram	Sleeping Sickness (Trypanosomiasis)	Often	Never	Yes	Safe water practices	Lack of resources	Not Approved
25-34	Male	Single	Completed Tertiary Education	Unemployed	None	3-4	No	Internet	Fair	Environmental health	Yes	It improves overall public health	A focus on environmental health	Malaria	Yes	Vaccinating animals	Important	Neutral	Agree	Supportive	Agree	A little	Daily	Take to veterinarian	Take to veterinarian	Always	Cow	Tuberculosis (TB)	Always	Always	No	Proper sanitation of facilities	Financial constraints	Not Approved
18-24	Male	Single	Completed Tertiary Education	Unemployed	None	7-9	Yes	Media (TV, radio, newspapers)	Good	Human health	Yes	It improves overall public health	A focus on animal health	Malaria	No	Vaccinating animals	Not sure	Neutral	Agree	Supportive	Agree	A little	Daily	Take to veterinarian	Take to veterinarian	Always	Pig	Anthrax	Always	Never	No	None	Financial constraints	Not Approved
18-24	Female	Single	Completed Secondary Education	Unemployed	None	1-2	Yes	Internet	Good	Human health	Yes	It promotes environmental sustainability	A focus on environmental health	Malaria	Yes	None of the above	Important	Agree	Agree	Don’t know how to support	Agree	A lot	Daily	Take to veterinarian	Take to veterinarian	Sometimes	Chicken	Cholera	Always	Always	Yes	Proper sanitation of facilities	Financial constraints	Not Approved
18-24	Female	Single	Completed Secondary Education	Student	Environmental health	1-2	Yes	Internet	Good	Environmental health	Yes	It helps prevent zoonotic diseases	A focus on environmental health	Malaria	Yes	None of the above	Important	Agree	Agree	Don’t know how to support	Agree	A little	Daily	Take to veterinarian	Take to veterinarian	Always	Cow	Tuberculosis (TB)	Always	Always	Yes	Safe water practices	Cultural beliefs	Not Approved
18-24	Male	Single	Completed Tertiary Education	Student	None	1-2	Yes	Internet	Good	Environmental health	Yes	It promotes environmental sustainability	A focus on environmental health	Malaria	Yes	Maintaining personal hygiene	Important	Neutral	Agree	Willing to support	Agree	A little	Daily	Take to veterinarian	Take to veterinarian	Always	Rat	Brucellosis	Always	Always	No	Safe water practices	Lack of resources	Not Approved
18-24	Male	Single	Completed Secondary Education	Student	None	1-2	Yes	Internet	Good	Environmental health	Yes	It improves overall public health	A focus on environmental health	Malaria	Yes	Proper waste disposal	Important	Agree	Agree	Supportive	Agree	Not at all	Daily	Take to veterinarian	Take to veterinarian	Always	Pig	Lassa Fever	Sometimes	Always	Yes	Safe water practices	Financial constraints	Not Approved
